# Supplementary material for: Dual-ligand-functionalized dodeca-nuclear lanthanide–tungsten-cluster incorporated selenotungstates and fluorescence detection of dipicolinic acid (an anthrax biomarker)
Source: Royal Society of Chemistry journal article supplement (doi:10.1039/d3qi00361b), 2023-01-01
Supplement: d3qi00361b1.pdf [file d3qi00361b1.pdf]

## Electronic Supporting Information

### **Dual-ligands-functionalized dodeca-nuclear-lanthanide-tungsten-cluster incorporated selenotungstates and fluorescence detection of dipicolonic acid (an anthrax biomarker)**

Tiantian Gong, Sen Yang, Zixu Wang, Mengyao Li, Siyu Zhang, Jiancai Liu,\* Lijuan Chen,\* Junwei Zhao\*

*Henan Key Laboratory of Polyoxometalate Chemistry, College of Chemistry and Chemical Engineering, Henan University, Kaifeng 475004, China*

**Scheme S1** Chemical structures and acronyms of 2,3-pyrazine dicarboxylic acid (a), fumaric acid (b), tris(hydroxymethyl) aminomethane (c), ethylenediamine (d), 1,3,5-benzenetricarboxylic acid (e), isonicotinic acid (f) and 2,5-pyridine-dicarboxylic acid (g).

**Scheme S2** Chemical structures of DPA (a), 2,3-pyridine dicarboxylic acid (b), 2,5-pyridine dicarboxylic acid (c), 2-picolinic acid (d), nicotinic acid (e), benzoic acid (f), *p*-phthalic acid (g), *m*-phthalic acid (h); amino acids: (glycine (i), glutathione (j)).

**Fig. S1** (a–d) Experimental and simulated PXRD patterns of **1–4**.

**Fig. S2** (a–d) IR spectra and the corresponding crystal colors of **1–4**.

**Fig. S3** (a–d) TG curves of **1–4**.

**Fig. S4** The highlighted O2 atom in the center of symmetry of the **4a** polyanion.

**Fig. S5** View of a “hourglass-shaped”  $\{W_6(HFMA)_2\}$  cluster.

**Fig. S6** View of the seven-membered ring formed by the  $Eu^{13+}$  ion and five-membered ring formed by the  $Eu^{23+}$  ion.

**Fig. S7** (a, b) Coordination geometries of  $Eu^{13+}$  and  $Eu^{23+}$  ions.

**Fig. S8** Views of  $\{Eu_4W_8\}$  cluster in three different orientations: (a) front view, (b) rotated view, (c) bottom view.

**Fig. S9** (a) “N”-shaped  $\{W_6\}$  segment. (b, c) Pseudo-hexagonal configuration of the  $\{Eu_4W_2\}$  segment.

**Fig. S10** The edge lengths (a) and two adjacent angles (b) of parallelogram  $\{Eu_4\}$  cluster.

**Fig. S11** (a) View of the parallelogram built by  $\{Eu_4\}$  cluster. (b) The angle between the parallelogram and the triangle (Eu1, Eu2, W1).

**Fig. S12** (a) View of Layer A in **4a** along the *c* axis. (b) View of Layer B in **4a** along the *c* axis. (c) The 3-D stacking mode of **4a** along the *b* axis. (d) The repeating unit of **4a**.

**Fig. S13.** The CIE 1931 chromaticity diagram of solid-state **4**.

**Fig. S14** (a) The ESI-MS spectrum of **4** in aqueous solution. (b) The UV-visible spectra of **4** in aqueous solution in 48 h.

**Fig. S15** The ratio of  $I_{5D_0 \rightarrow 7F_2} / I_{5D_0 \rightarrow 7F_1}$  with different DPA concentrations.

**Fig. S16** Evolution of the intensity ratio ( $I/I_0$ ) with various concentrations of DPA in three trials.

**Fig. S17** The emission spectral evolution of **4** with different concentrations (0–325  $\mu$ M) of different detection substances: (a) DPA; (b) 2,3-PDCA; (c) 2,5-PDCA; (d) 2-PA; (e) NA; (f) BA; (g) *p*-PA; (h) *m*-PA; (i)  $H_3BTC$ ; (j) Gly; (k) GSH; (l)  $K^+$ ; (m)  $Mg^{2+}$ ; (n)  $Ca^{2+}$ ; (o)  $Cl^-$ ; (p)  $CH_3COO^-$ .

**Fig. S18** (a) FL emission spectra of **4** in the presence of DPA and the interferents (325  $\mu$ M). (b) Variation of the FL emission intensity of  $^5D_0 \rightarrow ^7F_2$  transition of **4** with different interferents. (c) Variation of the FL emission intensity of  $^5D_0 \rightarrow ^7F_2$  transition of **4** in the simultaneous presence of DPA and interferents (325  $\mu$ M) (In the order: (1) DPA, (2) 2,3-PDCA, (3) 2,5-PDCA, (4) 2-PA, (5) NA, (6) BA, (7) *p*-PA, (8) *m*-PA, (9)  $H_3BTC$ , (10) Gly, (11) GSH, (12)  $K^+$ , (13)  $Mg^{2+}$ , (14)  $Ca^{2+}$ , (15)  $Cl^-$ , (16)  $CH_3COO^-$ ).

**Fig. S19** The lifetime decay curves of **4** obtained by monitoring the emission at 613 nm and the excitation at 395 nm in the presence of each interferent with different concentrations (0 to 300  $\mu$ M): (a) 2-PA, (b) Gly, (c)  $Mg^{2+}$  (Inset: the variation of average lifetime of **4** with the concentration of each interferent).

**Fig. S20** (a) FL lifetime decay curves of **4** in H<sub>2</sub>O with different DPA concentrations. (b) Variation of the average lifetime of **4** in H<sub>2</sub>O with different DPA concentrations.

**Fig. S21** FL lifetime decay curves of **4** in the D<sub>2</sub>O system with different DPA concentrations (0 μM (a), 100 μM (b), 200 μM (c), 300 μM(d)).

**Fig. S22** (a) FL spectra of Eu(NO<sub>3</sub>)<sub>3</sub>·6H<sub>2</sub>O (3 mg / mL) in H<sub>2</sub>O with different DPA concentrations ( $\lambda_{\text{ex}} = 396 \text{ nm}$ ). (b) Variation of the FL emission intensity at 592 nm of Eu(NO<sub>3</sub>)<sub>3</sub>·6H<sub>2</sub>O with the DPA concentration in H<sub>2</sub>O.

**Fig. S23** (a) FL spectra of Eu(NO<sub>3</sub>)<sub>3</sub>·6H<sub>2</sub>O (3 mg / mL) in the D<sub>2</sub>O system with different DPA concentrations ( $\lambda_{\text{ex}} = 396 \text{ nm}$ ). (b) Variation of the FL emission intensity at 592 nm of Eu(NO<sub>3</sub>)<sub>3</sub>·6H<sub>2</sub>O (3 mg / mL) with the DPA concentration in the D<sub>2</sub>O system. (c) FL lifetime decay curves of Eu(NO<sub>3</sub>)<sub>3</sub>·6H<sub>2</sub>O (3 mg / mL) in H<sub>2</sub>O with different DPA concentrations (inset: the change of the lifetime of Eu(NO<sub>3</sub>)<sub>3</sub>·6H<sub>2</sub>O (3 mg / mL) at 592 nm with DPA concentration) ( $\lambda_{\text{em}} = 592 \text{ nm}$ ). (d) FL lifetime decay curves of Eu<sup>3+</sup> in D<sub>2</sub>O with different DPA concentrations (inset: the change of the lifetime of Eu(NO<sub>3</sub>)<sub>3</sub>·6H<sub>2</sub>O (3 mg / mL) at 592 nm with the DPA concentration) ( $\lambda_{\text{em}} = 592 \text{ nm}$ ).

**Table S1.** Crystallographic data and structure refinements for **1–4**.

**Table S2.** The ratios of  $I(^5D_0 \rightarrow ^7F_2) / I(^5D_0 \rightarrow ^7F_1)$  for **4** in aqueous solution with different DPA concentrations.

**Table S3.** The standard deviations for the **4**-based FL sensor.

**Table S4.** Performance comparison of several sensors for the detection of DPA.

**Table S5.** Detection results of DPA in tap water and human serum sample.

**Table S6.** Summary of the lifetimes of Eu<sup>3+</sup> in H<sub>2</sub>O and D<sub>2</sub>O with different DPA concentrations and the calculated q values.

## Materials and measurements

All chemicals and reagents were purchased commercially and used without further purification. IR spectra were recorded on a Perkin–Elmer FT–IR spectrophotometer by using KBr pellets in the wavenumber range of 4000–450  $\text{cm}^{-1}$ . Elemental analyses (N, H, C) were performed on a Perkin–Elmer 2400–II CHNS analyzer. Inductively coupled plasma-atomic emission spectroscopy (ICP–AES) analyses were conducted on a Perkin–Elmer Optima 2000 ICP–AES spectrometer. Powder X–ray diffraction (PXRD) patterns were measured on a Bruker AXS D8 Advance diffractometer with Cu  $K\alpha$  radiation ( $\lambda = 1.54056 \text{ \AA}$ ) at 293 K. Thermogravimetric (TG) analyses were carried out on a Bruker Tensor–II TGA instrument under a flowing  $\text{N}_2$  atmosphere (temperature range: 25–1000  $^\circ\text{C}$ , heating rate: 10  $^\circ\text{C min}^{-1}$ ). Electrospray ionization mass spectrometry (ESI–MS) was performed on an AB SCIEX Triple TOF 4600 spectrometer operating in negative ion mode and the data was analyzed using the Peakview 2.0 software provided. Photoluminescence spectra (excitation spectra, emission spectra and lifetimes) were collected by Edinburgh FLS 980 Analytical Instrument apparatus equipped with a 450 W xenon lamp and a  $\mu\text{F900H}$  high-energy microsecond flashlamp as the excitation sources.

## X-ray crystallography

A good-quality single-crystal of **1** was picked carefully and its diffraction data were collected on a Bruker D8 Venture Photon II diffractometer equipped with CCD two-dimensional detector using monochromated Mo  $K\alpha$  radiation ( $\lambda = 0.71073 \text{ \AA}$ ) at 296 K. Routine Lorentz and polarization corrections were applied and a multi-scan absorption correction was utilized with the SADABS program. Direct methods were used to solve the structure, refined on  $F^2$  by full-matrix least-squares method using the SHELXTL–97 program.<sup>1–3</sup> All H atoms connected to N and C atoms were generated geometrically and refined isotropically as a riding model using the default SHELXTL parameters. No hydrogen atoms associated with water molecules are located from the difference Fourier map. All nonhydrogen atoms are refined anisotropically except for some sodium, carbon, oxygen atoms and water molecules. In the refinement of **4**, twelve  $[\text{H}_2\text{N}(\text{CH}_3)_2]^+$  cations, two  $\text{Cs}^+$  cations, two  $\text{Na}^+$  cations and twenty one lattice water molecules in the molecular unit were found from the Fourier maps. However, there are still solvent accessible voids in the check cif report of crystal structure of **4**, indicating that some cations or lattice water molecules should exist in the structure that can't be found from the weak residual electron peaks. Therefore, on the basis of charge balance, elemental analysis and TG analysis, two  $[\text{H}_2\text{N}(\text{CH}_3)_2]^+$  cations and nine lattice water molecules were directly added to the molecular formula of **4**. The crystallographic data and structure refinements for **1–4** are demonstrated in Table S1. Crystallographic data and structure refinements for **1–4** reported in this paper have been deposited in the Cambridge Crystallographic Data Centre with CCDC 2244122–2244125 for **1–4**. These data can be obtained free of charge from the Cambridge Crystallographic Data Centre via [www.ccdc.cam.ac.uk/data\\_request/cif](http://www.ccdc.cam.ac.uk/data_request/cif).

**Synthesis of  $[\text{H}_2\text{N}(\text{CH}_3)_2]_{16}\text{Na}_2[\text{Ce}_4(\text{H}_2\text{O})_6(\text{HPZDA})_2(\text{HFMA})_2\text{W}_8\text{O}_{21}][\text{B-}\alpha\text{-SeW}_9\text{O}_{33}]_4\cdot 29\text{H}_2\text{O}$  (**1**).**  $\text{Na}_2\text{WO}_4\cdot 2\text{H}_2\text{O}$  (5.002 g, 15.165 mol),  $\text{Na}_2\text{SeO}_3$  (0.101 g, 0.584 mmol), dimethylamine hydrochloride (1.502 g, 18.419 mmol), 2,3-pyrazinedicarboxylic acid ( $\text{H}_2\text{PZDA}$ ) (0.401 g, 2.385 mmol) and glacial acetic acid ( $\text{CH}_3\text{COOH}$ ) (2.0 mL, 34.972 mmol) were dissolved in 28 mL distilled water under stirring, and the pH value of the solution was adjusted to

3.00 by 6 M HCl. Then,  $\text{Ce}(\text{NO}_3)_3 \cdot 6\text{H}_2\text{O}$  (0.501 g, 1.154 mmol) and fumaric acid ( $\text{H}_2\text{FMA}$ ) (0.202 g, 1.740 mmol) were consecutively added to the solution and the final pH value of the solution was kept at 3.00 by 2 M NaOH. This solution was stirred for 20 min, heated at 60 °C for 2 h, cooled to room temperature and filtered. About several weeks later, yellow block crystals were obtained through the evaporation process. Yield: 0.501 g (25.85 % based on  $\text{Na}_2\text{SeO}_3$ ). Anal. calcd. (found%) for  $\text{C}_{52}\text{H}_{210}\text{Ce}_4\text{N}_{20}\text{Na}_2\text{O}_{204}\text{Se}_4\text{W}_{44}$  (**1**): C 4.66 (4.70), H 1.58 (1.73), N 2.09 (2.18), W 60.40 (60.22), Se 2.36 (2.20), Ce 4.19 (4.15), Na 0.34 (0.25).

**Synthesis of  $[\text{H}_2\text{N}(\text{CH}_3)_2]_{16}\text{Na}_2[\text{Pr}_4(\text{H}_2\text{O})_6(\text{HPZDA})_2(\text{HFMA})_2\text{W}_8\text{O}_{21}][\text{B-}\alpha\text{-SeW}_9\text{O}_{33}]_4 \cdot 29\text{H}_2\text{O}$  (**2**).** The synthetic procedure of **2** was similar to **1** except that  $\text{Ce}(\text{NO}_3)_3 \cdot 6\text{H}_2\text{O}$  was replaced by  $\text{Pr}(\text{NO}_3)_3 \cdot 6\text{H}_2\text{O}$  (0.502 g, 1.154 mmol). Green block crystals of **2** were obtained. Yield: 0.490 g (25.28 % based on  $\text{Na}_2\text{SeO}_3$ ). Anal. calcd. (found%) for  $\text{C}_{52}\text{H}_{210}\text{Pr}_4\text{N}_{20}\text{Na}_2\text{O}_{204}\text{Se}_4\text{W}_{44}$  (**2**): C 4.66 (4.52), H 1.58 (1.75), N 2.09 (2.05), W 60.39 (60.12), Se 2.36 (2.15), Pr 4.21 (3.99), Na 0.34 (0.32).

**Synthesis of  $[\text{H}_2\text{N}(\text{CH}_3)_2]_{16}\text{Na}_2[\text{Nd}_4(\text{H}_2\text{O})_6(\text{HPZDA})_2(\text{HFMA})_2\text{W}_8\text{O}_{21}][\text{B-}\alpha\text{-SeW}_9\text{O}_{33}]_4 \cdot 29\text{H}_2\text{O}$  (**3**).** The synthetic procedure of **3** was similar to **1** except that  $\text{Ce}(\text{NO}_3)_3 \cdot 6\text{H}_2\text{O}$  was replaced by  $\text{Nd}(\text{NO}_3)_3 \cdot 6\text{H}_2\text{O}$  (0.499 g, 1.138 mmol). Purple block crystals of **3** were obtained. Yield: 0.475 g (24.47 % based on  $\text{Na}_2\text{SeO}_3$ ). Anal. calcd. (found%) for  $\text{C}_{52}\text{H}_{210}\text{Nd}_4\text{N}_{20}\text{Na}_4\text{O}_{204}\text{Se}_4\text{W}_{44}$  (**3**): C 4.66 (4.57), H 1.58 (1.77), N 2.09 (2.12), W 60.33 (60.55), Se 2.36 (2.25), Nd 4.30 (4.44), Na 0.34 (0.30).

**Synthesis of  $[\text{H}_2\text{N}(\text{CH}_3)_2]_{14}\text{Cs}_2\text{Na}_2[\text{Eu}_4(\text{H}_2\text{O})_6(\text{HPZDA})_2(\text{HFMA})_2\text{W}_8\text{O}_{21}][\text{B-}\alpha\text{-SeW}_9\text{O}_{33}]_4 \cdot 30\text{H}_2\text{O}$  (**4**).** The synthetic procedure of **4** was similar to **1** except that  $\text{Ce}(\text{NO}_3)_3 \cdot 6\text{H}_2\text{O}$  was replaced by  $\text{Eu}(\text{NO}_3)_3 \cdot 6\text{H}_2\text{O}$  (0.500 g, 1.121 mmol), and add CsCl (0.300 g, 1.782 mmol). Colorless block crystals of **4** were obtained. Yield: 0.200 g (10.28 % based on  $\text{Na}_2\text{SeO}_3$ ). Anal. calcd. (found%) for  $\text{C}_{48}\text{H}_{196}\text{Cs}_2\text{Eu}_4\text{N}_{16}\text{Na}_2\text{O}_{205}\text{Se}_4\text{W}_{44}$  (**4**): C 4.24 (4.42), H 1.45 (1.61), Cs 1.95 (2.16), N 1.65 (1.85), W 59.47 (59.69), Se 2.32 (2.15), Eu 4.47 (4.35), Na 0.34 (0.38).

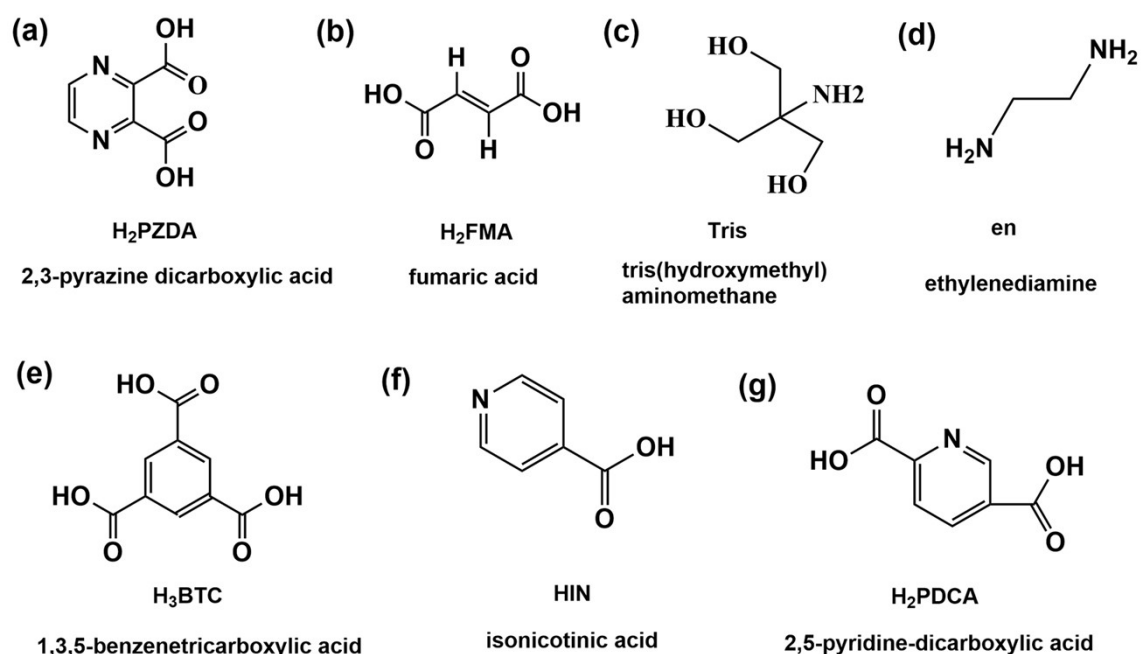

**Scheme S1** Chemical structures and acronyms of 2,3-pyrazine dicarboxylic acid (a), fumaric acid (b), tris(hydroxymethyl) aminomethane (c), ethylenediamine (d), 1,3,5-benzenetricarboxylic acid (e), isonicotinic acid (f) and 2,5-pyridine-dicarboxylic acid (g).

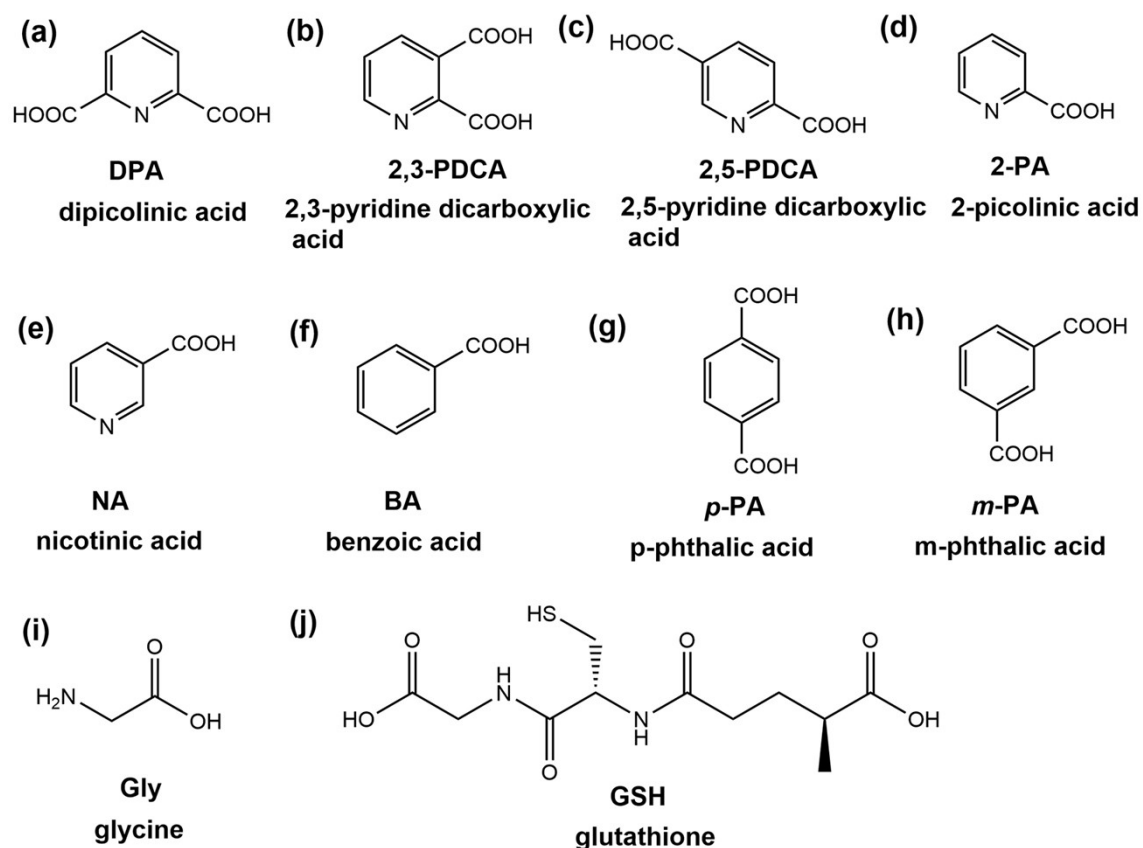

**Scheme S2** Chemical structures of DPA (a), 2,3-pyridine dicarboxylic acid (b), 2,5-pyridine dicarboxylic acid (c), 2-picolinic acid (d), nicotinic acid (e), benzoic acid (f), p-phthalic acid (g), m-phthalic acid (h); amino acids:(glycine (i), glutathione (j)).

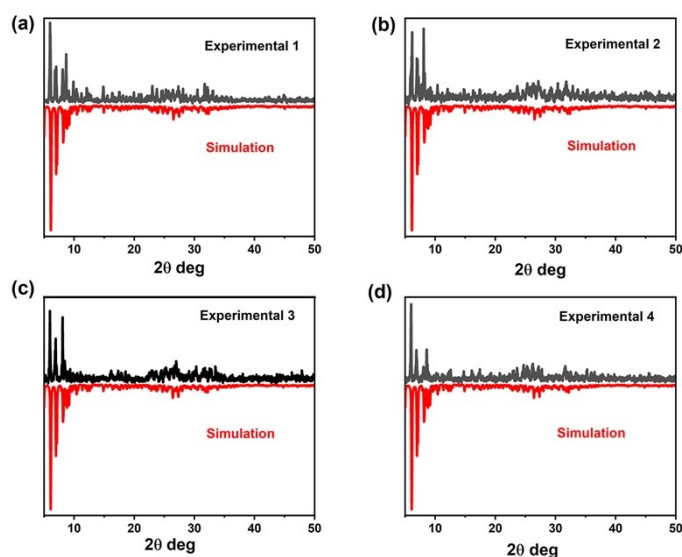

**Fig. S1** (a–d) Experimental and simulative PXRD patterns of 1–4.

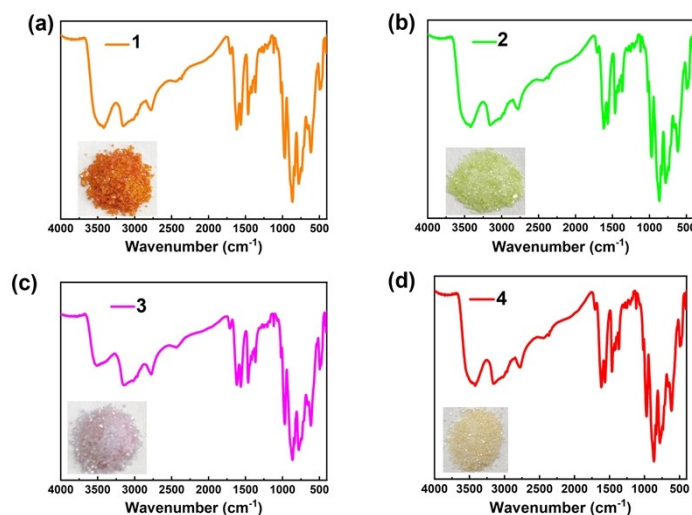

**Fig. S2** (a–d) IR spectra and the corresponding crystal colors of **1–4**.

IR spectra of **1–4** were recorded by a Perkin–Elmer FT–IR spectrophotometer (Fig. S2). Basically, it can be observed that four compounds have similar characteristic peaks, which indicates that they have the same anionic framework structure. Four characteristic vibrations  $\nu(\text{W-O}_t)$ ,  $\nu(\text{Se-O}_a)$ ,  $\nu(\text{W-O}_b)$ , and  $\nu(\text{W-O}_c)$  are observed at 971, 866, 835, 780, 739  $\text{cm}^{-1}$  for **1**, 969, 866, 833, 780, 739  $\text{cm}^{-1}$  for **2**, 970, 864, 778, 739  $\text{cm}^{-1}$  for **3**, 970, 866, 833, 781, 740  $\text{cm}^{-1}$  for **4**, severally.<sup>4</sup> In addition, the absorption bands at 1638–1021  $\text{cm}^{-1}$  can be regarded as characteristic peaks of HPZDA<sup>−</sup> and HFMA<sup>−</sup> ligands. Wherein, the asymmetric and symmetric stretching vibrations of carboxylic groups appear at 1626–1576  $\text{cm}^{-1}$  and 1464–1366  $\text{cm}^{-1}$ , respectively.<sup>5</sup> Besides, three bands  $\nu(\text{N-H})$  (3153  $\text{cm}^{-1}$ ),  $\nu(\text{C-H})$  (2780  $\text{cm}^{-1}$ ) and  $\nu(\text{C-N})$  (1463  $\text{cm}^{-1}$ ) for **1**,  $\nu(\text{N-H})$  (3157  $\text{cm}^{-1}$ ),  $\nu(\text{C-H})$  (2782  $\text{cm}^{-1}$ ) and  $\nu(\text{C-N})$  (1465  $\text{cm}^{-1}$ ) for **2**,  $\nu(\text{N-H})$  (3148  $\text{cm}^{-1}$ ),  $\nu(\text{C-H})$  (2782  $\text{cm}^{-1}$ ) and  $\nu(\text{C-N})$  (1462  $\text{cm}^{-1}$ ) for **3**,  $\nu(\text{N-H})$  (3151  $\text{cm}^{-1}$ ),  $\nu(\text{C-H})$  (2777  $\text{cm}^{-1}$ ) and  $\nu(\text{C-N})$  (1462  $\text{cm}^{-1}$ ) for **4** that demonstrate the existence of dimethylamine groups in the structures.<sup>4</sup> In the high-wavenumber region, the broad absorption bands at around 3410  $\text{cm}^{-1}$  and 1615  $\text{cm}^{-1}$  are typical features of lattice and coordinate water molecules.

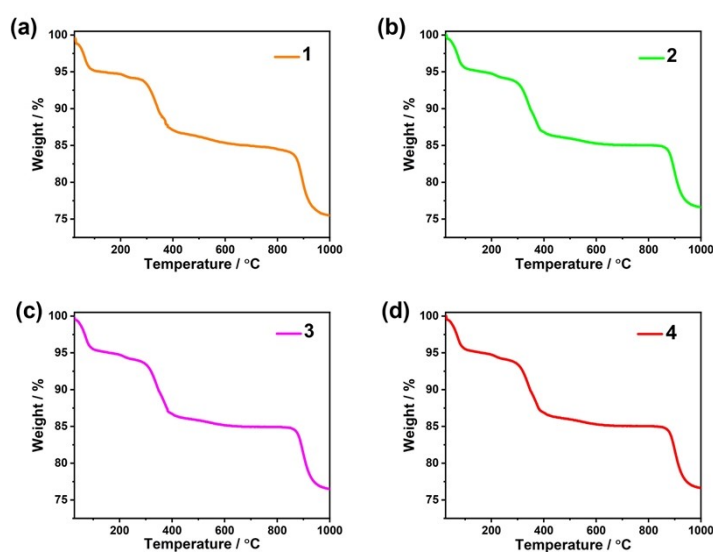

**Fig. S3** (a–d) TG curves of **1–4**.

The thermal stability measurements of **1–4** were performed under N<sub>2</sub> atmosphere with a heating speed of 10 °C /min from 25 to 1000 °C. The TG curves of **1–4** display similar three-step weight loss. The first weight loss of 4.90 % (calcd. 4.71 %) for **1**, 4.95 % (calcd. 4.71 %) for **2**, 5.01 % (calcd. 4.70 %) for **3** and 4.95 % (calcd. 4.62 %) for **4** from 25 to 200 °C belongs to the liberation of 29 lattice water molecules and 6 coordination water molecules for **1–3**, 30 lattice water molecules and 6 coordination water molecules for **4**. Keeping heating to 750 °C, the second weight loss of 10.20 % (calcd. 10.43 %) for **1**, 10.15 % (calcd. 10.41 %) for **2**, 10.19 % (calcd. 10.42 %) for **3** and 9.80 % (calcd. 9.45 %) for **4** occurs, which corresponds to the loss of 16 dimethylamine molecules, 2 H<sub>2</sub>PDCA ligands, 2 H<sub>2</sub>FMA ligands and dehydration of 12 protons for **1–3**, and 14 dimethylamine molecules, 2 H<sub>2</sub>PDCA ligands, 2 H<sub>2</sub>FMA ligands and dehydration of 10 protons for **4**. Finally, as the temperature continues to rise, the main polyoxoanion skeletons of **1–4** begin to decompose.

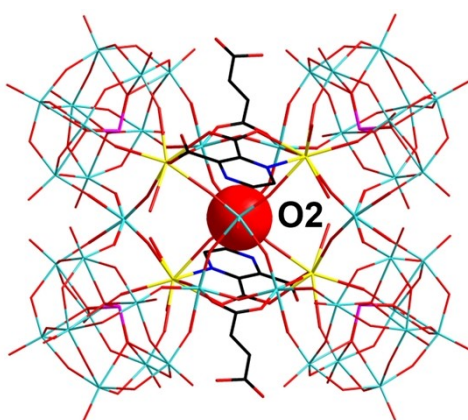

**Fig. S4** The highlighted O2 atom in the center of symmetry of the **4a** polyanion.

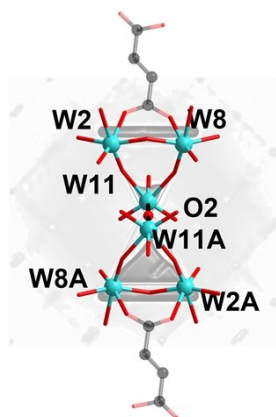

**Fig. S5** View of a “hourglass-shaped” {W<sub>6</sub>(HFMA)<sub>2</sub>} cluster.

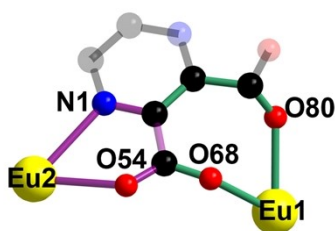

**Fig. S6** View of the seven-membered formed by the Eu1<sup>3+</sup> ion and five-membered ring formed by the Eu2<sup>3+</sup> ion.



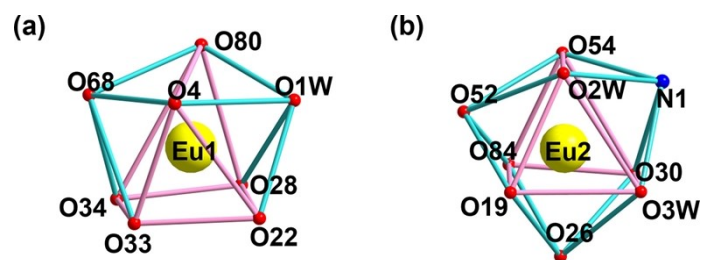

Fig. S7 (a, b) Coordination geometries of  $\text{Eu}^{13+}$  and  $\text{Eu}^{23+}$  ions.

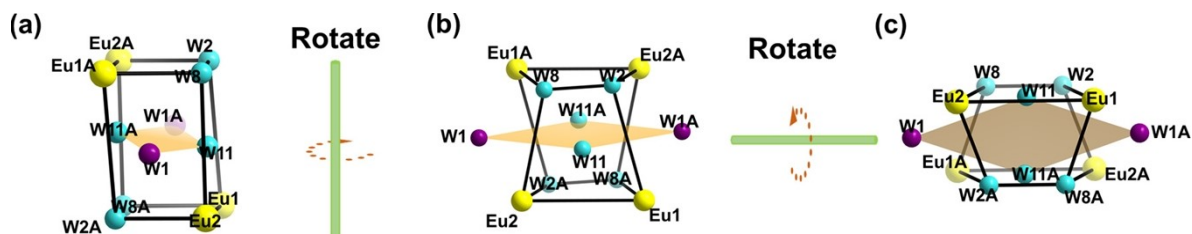

Fig. S8 Views of  $\{\text{Eu}_4\text{W}_8\}$  cluster in three different orientations: (a) front view, (b) rotated view, (c) bottom view.

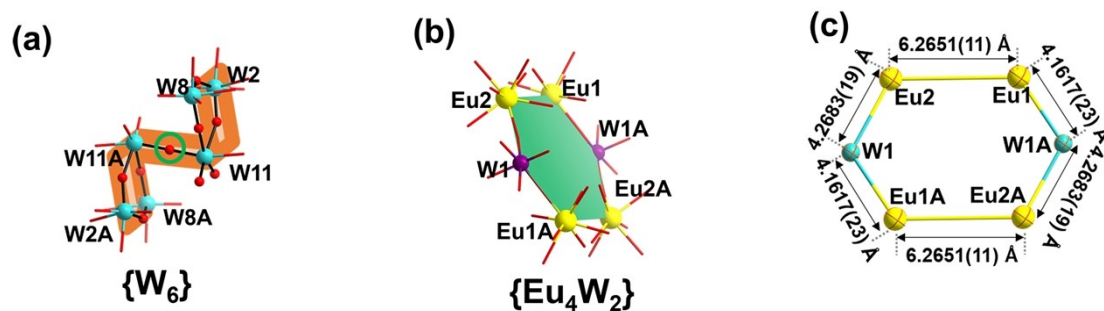

Fig. S9 (a) "N"-shaped  $\{\text{W}_6\}$  segment. (b, c) Pseudo-hexagonal configuration of the  $\{\text{Eu}_4\text{W}_2\}$  segment.

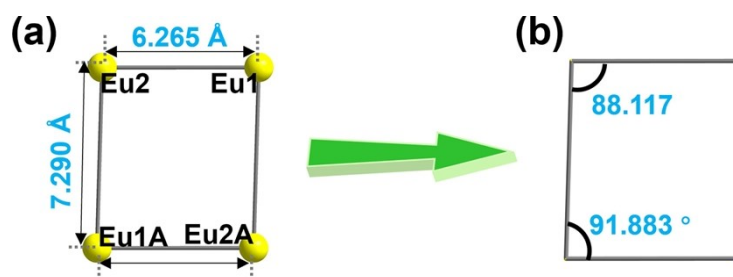

Fig. S10 The edge lengths (a) and two adjacent angles (b) of parallelogram  $\{\text{Eu}_4\}$  cluster.

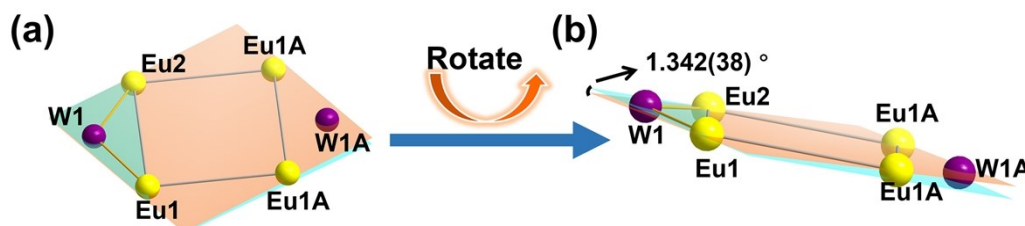

Fig. S11 (a) View of the parallelogram built by  $\{\text{Eu}_4\}$  cluster. (b) The angle between the parallelogram and the triangle ( $\text{Eu}_1, \text{Eu}_2, \text{W}_1$ ).

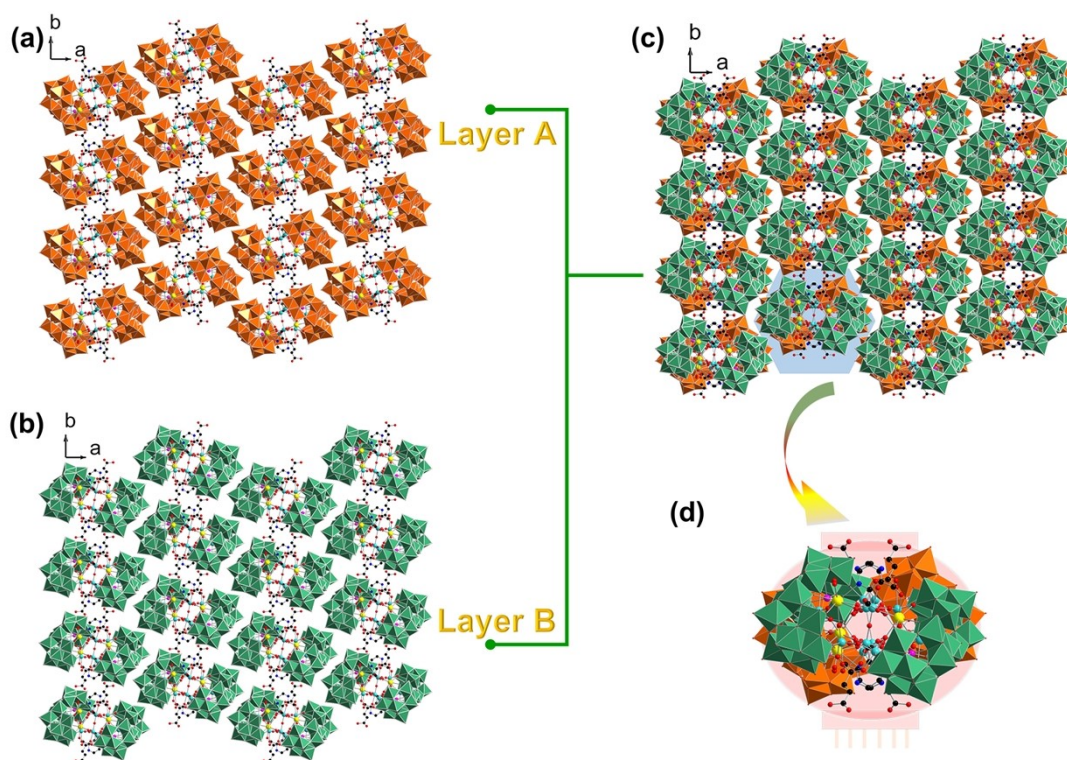

**Fig. S12** (a) View of Layer A in **4a** along the *c* axis. (b) View of Layer B in **4a** along the *c* axis. (c) The 3-D stacking mode of **4a** along the *b* axis. (d) The repeating unit of **4a**.

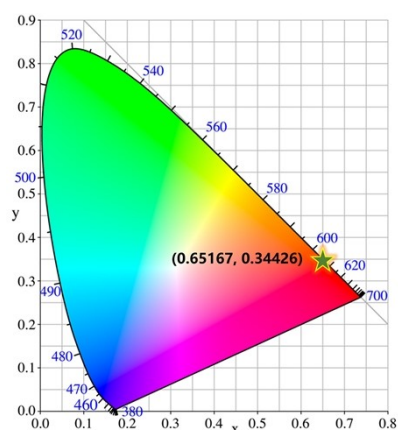

**Fig. S13** The CIE 1931 chromaticity diagram of solid-state **4**.

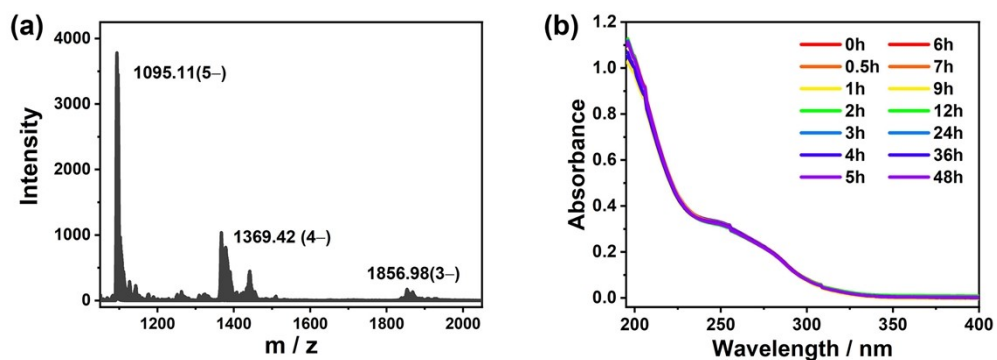

**Fig. S14** (a) The ESI-MS spectrum of **4** in aqueous solution. (b) The UV-visible spectra of **4** in aqueous solution in 48 h.

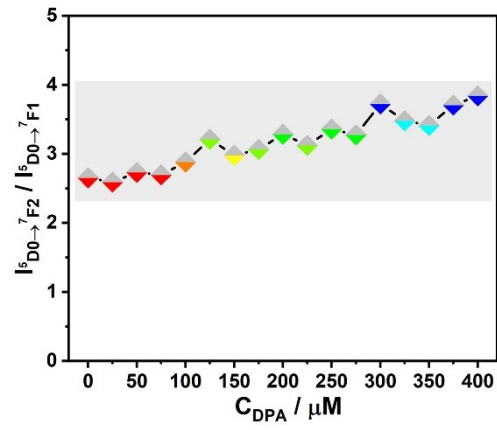

Fig. S15 The ratio of  $I_{5D0 \rightarrow 7F2} / I_{5D0 \rightarrow 7F1}$  with different DPA concentrations.

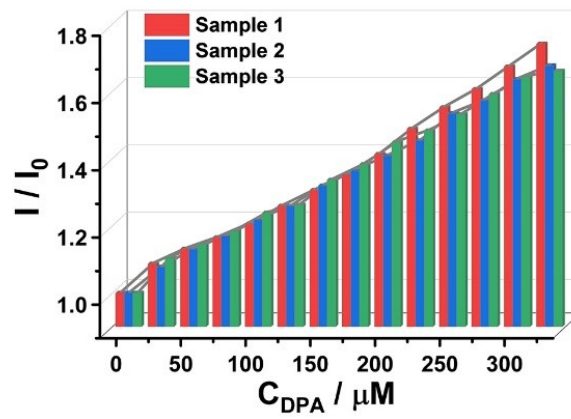

Fig. S16 Evolution of the intensity ratio ( $I/I_0$ ) with various concentrations of DPA in three trials.

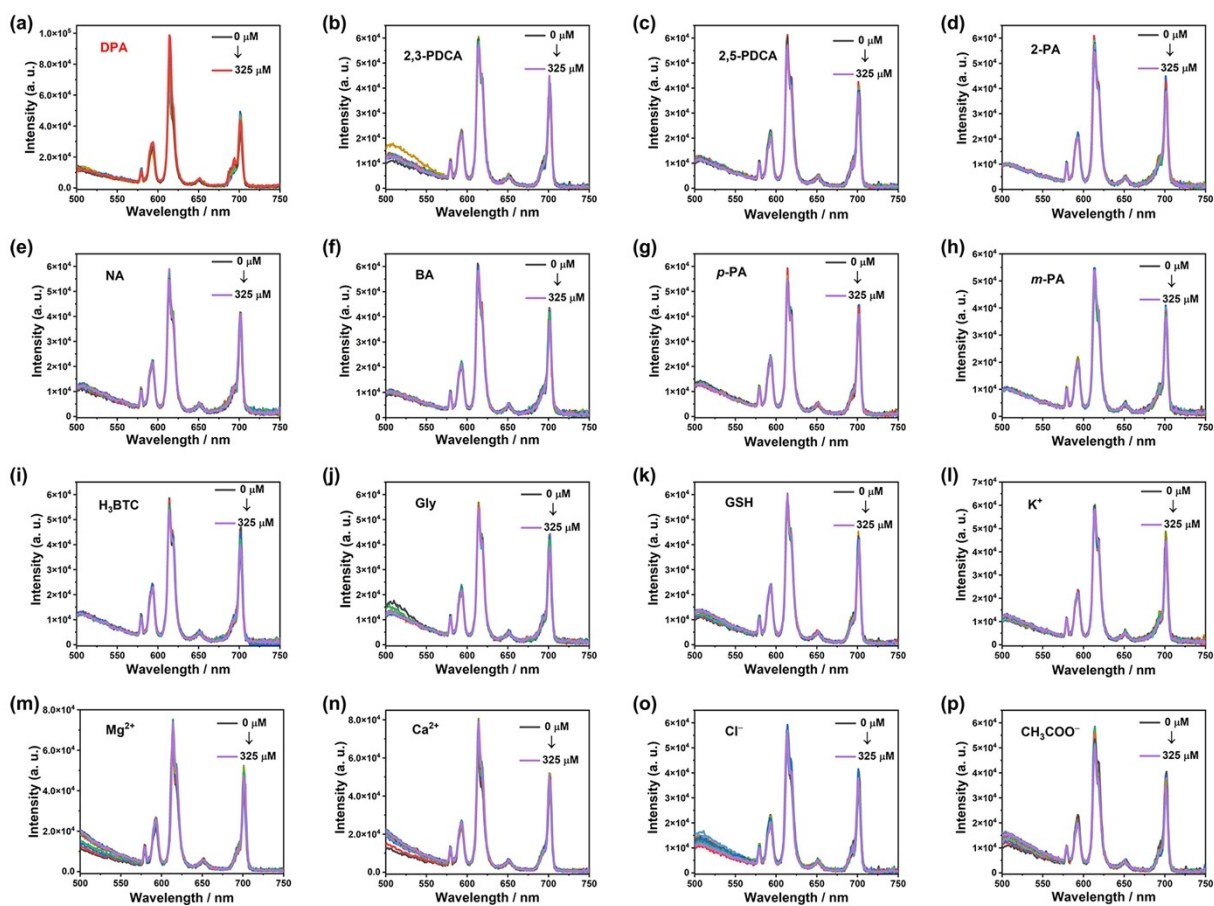

**Fig. S17** The emission spectral evolution of **4** with different concentrations (0–325  $\mu\text{M}$ ) of different detection substances: (a) DPA; (b) 2,3-PDCA; (c) 2,5-PDCA; (d) 2-PA; (e) NA; (f) BA ;(g) *p*-PA; (h) *m*-PA; (i) H<sub>3</sub>BTC; (j) Gly; (k) GSH; (l) K<sup>+</sup>; (m) Mg<sup>2+</sup>; (n) Ca<sup>2+</sup>; (o) Cl<sup>-</sup>; (p) CH<sub>3</sub>COO<sup>-</sup>.

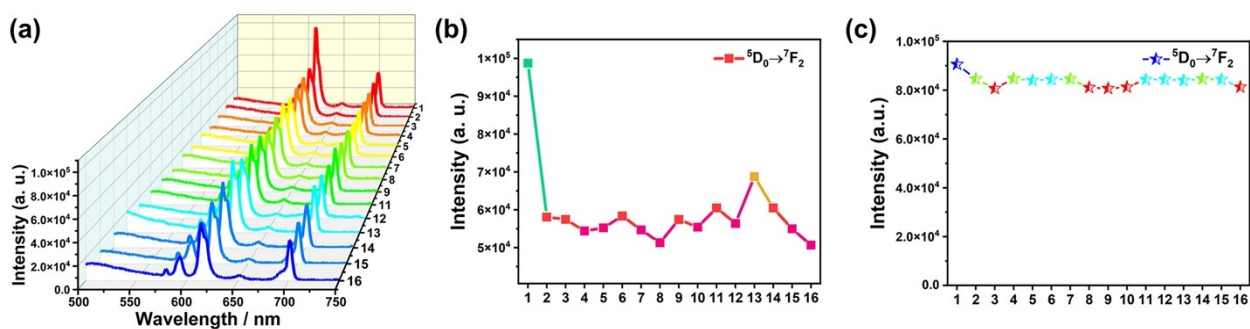

**Fig. S18** (a) FL emission spectra of **4** in the presence of DPA and the interferents (325  $\mu\text{M}$ ). (b) Variation of the FL emission intensity of  $^5\text{D}_0 \rightarrow ^7\text{F}_2$  transition of **4** with different interferents. (c) Variation of the FL emission intensity of  $^5\text{D}_0 \rightarrow ^7\text{F}_2$  transition of **4** in the simultaneous presence of DPA and interferents (325  $\mu\text{M}$ ) (In the order: (1) DPA, (2) 2,3-PDCA, (3) 2,5-PDCA, (4) 2-PA, (5) NA, (6) BA, (7) *p*-PA, (8) *m*-PA, (9) H<sub>3</sub>BTC, (10) Gly, (11) GSH, (12) K<sup>+</sup>, (13) Mg<sup>2+</sup>, (14) Ca<sup>2+</sup>, (15) Cl<sup>-</sup>, (16) CH<sub>3</sub>COO<sup>-</sup>).

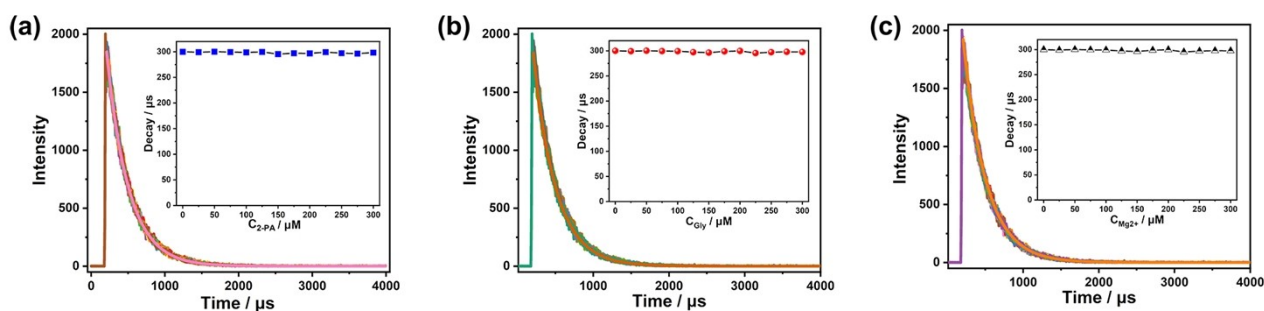

**Fig. S19** The lifetime decay curves of **4** obtained by monitoring the emission at 613 nm and the excitation at 395 nm in the presence of each interferent with different concentrations (0 to 300  $\mu\text{M}$ ): (a) 2-PA, (b) Gly, (c)  $\text{Mg}^{2+}$  (Inset: the variation of average lifetime of **4** with the concentration of each interferent).

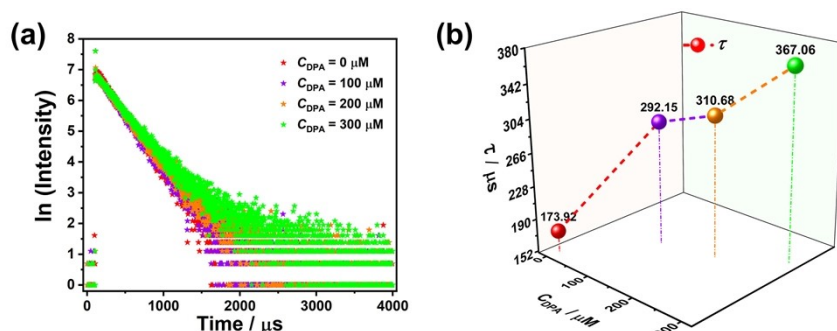

**Fig. S20** (a) FL lifetime decay curves of **4** in  $\text{H}_2\text{O}$  with different DPA concentrations. (b) Variation of the average lifetime of **4** in  $\text{H}_2\text{O}$  with different DPA concentrations.

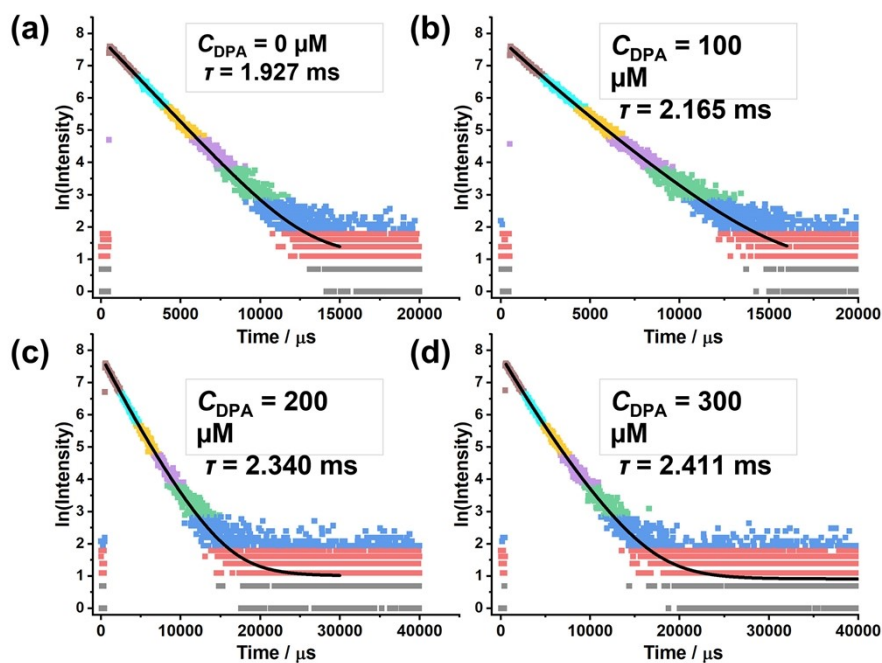

**Fig. S21** FL lifetime decay curves of **4** in the  $\text{D}_2\text{O}$  system with different DPA concentrations (0  $\mu\text{M}$  (a), 100  $\mu\text{M}$  (b), 200  $\mu\text{M}$  (c), 300  $\mu\text{M}$  (d)).

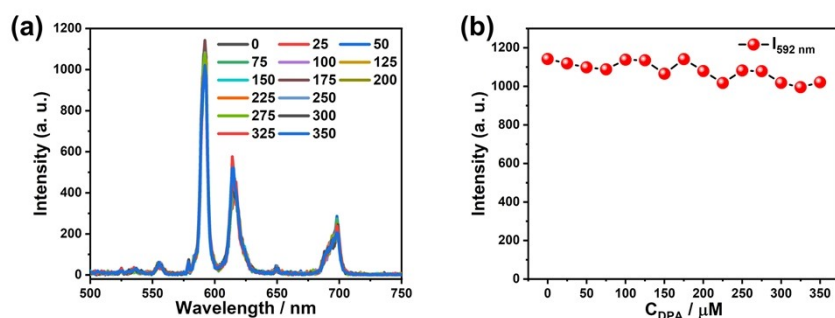

**Fig. S22** (a) FL spectra of  $\text{Eu}(\text{NO}_3)_3 \cdot 6\text{H}_2\text{O}$  (3 mg / mL) in  $\text{H}_2\text{O}$  with different DPA concentrations ( $\lambda_{\text{ex}} = 396$  nm). (b) Variation of the FL emission intensity at 592 nm of  $\text{Eu}(\text{NO}_3)_3 \cdot 6\text{H}_2\text{O}$  with the DPA concentration in  $\text{H}_2\text{O}$ .

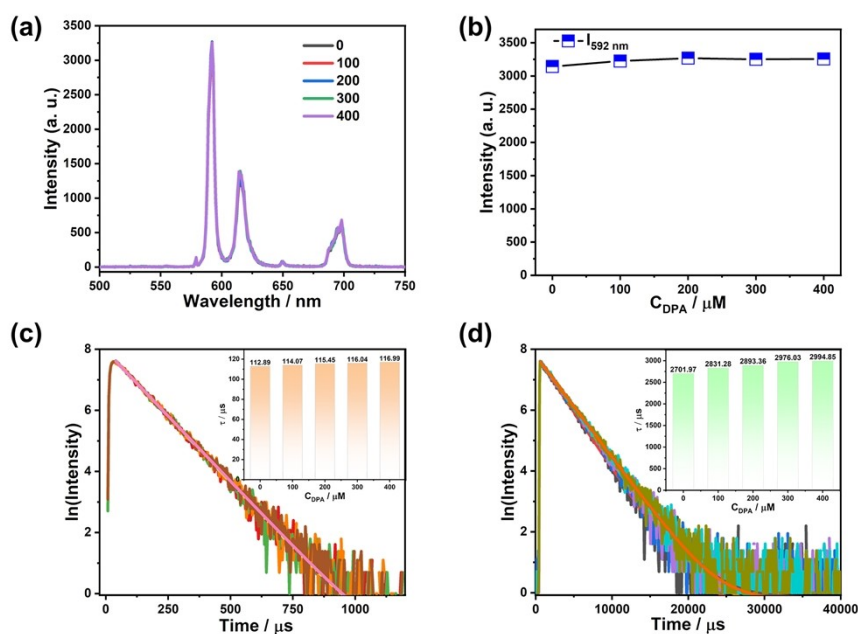

**Fig. S23** (a) FL spectra of  $\text{Eu}(\text{NO}_3)_3 \cdot 6\text{H}_2\text{O}$  (3 mg / mL) in the  $\text{D}_2\text{O}$  system with different DPA concentrations ( $\lambda_{\text{ex}} = 396$  nm). (b) Variation of the FL emission intensity at 592 nm of  $\text{Eu}(\text{NO}_3)_3 \cdot 6\text{H}_2\text{O}$  (3 mg / mL) with the DPA concentration in the  $\text{D}_2\text{O}$  system. (c) FL lifetime decay curves of  $\text{Eu}(\text{NO}_3)_3 \cdot 6\text{H}_2\text{O}$  (3 mg / mL) in  $\text{H}_2\text{O}$  with different DPA concentrations (inset: the change of the lifetime of  $\text{Eu}(\text{NO}_3)_3 \cdot 6\text{H}_2\text{O}$  (3 mg / mL) at 592 nm with DPA concentration) ( $\lambda_{\text{em}} = 592$  nm). (d) FL lifetime decay curves of  $\text{Eu}^{3+}$  in  $\text{D}_2\text{O}$  with different DPA concentrations (inset: the change of the lifetime of  $\text{Eu}(\text{NO}_3)_3 \cdot 6\text{H}_2\text{O}$  (3 mg / mL) at 592 nm with the DPA concentration) ( $\lambda_{\text{em}} = 592$  nm).

**Table S1.** Crystallographic data and structure refinements for **1–4**.

|                   | <b>1</b>                                                                                             | <b>2</b>                                                                                             | <b>3</b>                                                                                             | <b>4</b>                                                                                                          |
|-------------------|------------------------------------------------------------------------------------------------------|------------------------------------------------------------------------------------------------------|------------------------------------------------------------------------------------------------------|-------------------------------------------------------------------------------------------------------------------|
| Empirical formula | $\text{C}_52\text{H}_{210}\text{Ce}_4\text{N}_{20}\text{Na}_2\text{O}_{204}\text{Se}_4\text{W}_{44}$ | $\text{C}_52\text{H}_{210}\text{Pr}_4\text{N}_{20}\text{Na}_2\text{O}_{204}\text{Se}_4\text{W}_{44}$ | $\text{C}_52\text{H}_{210}\text{Nd}_4\text{N}_{20}\text{Na}_2\text{O}_{204}\text{Se}_4\text{W}_{44}$ | $\text{C}_{48}\text{H}_{196}\text{Cs}_2\text{Eu}_4\text{N}_{16}\text{Na}_2\text{O}_{205}\text{Se}_4\text{W}_{44}$ |
| Formula weight    | 13392.10                                                                                             | 13395.26                                                                                             | 13408.58                                                                                             | 13603.09                                                                                                          |
| Crystal system    | Monoclinic                                                                                           | Monoclinic                                                                                           | Monoclinic                                                                                           | Monoclinic                                                                                                        |
| Space group       | $C2/c$                                                                                               | $C2/c$                                                                                               | $C2/c$                                                                                               | $C2/c$                                                                                                            |

|                                                  |                                                                          |                                                                          |                                                                          |                                                                          |
|--------------------------------------------------|--------------------------------------------------------------------------|--------------------------------------------------------------------------|--------------------------------------------------------------------------|--------------------------------------------------------------------------|
| $a$ , Å                                          | 45.0061(8)                                                               | 44.9143(7)                                                               | 44.8905(11)                                                              | 44.624(2)                                                                |
| $b$ , Å                                          | 15.5833(4)                                                               | 15.5261(3)                                                               | 15.4986(5)                                                               | 15.5951(8)                                                               |
| $c$ , Å                                          | 40.9321(9)                                                               | 40.8082(7)                                                               | 40.7977(11)                                                              | 40.822(3)                                                                |
| $\alpha$ , deg                                   | 90                                                                       | 90                                                                       | 90                                                                       | 90                                                                       |
| $\beta$ , deg                                    | 119.1560(10)                                                             | 119.2310(10)                                                             | 119.2530(10)                                                             | 119.1010(10)                                                             |
| $\gamma$ , deg                                   | 90                                                                       | 90                                                                       | 90                                                                       | 90                                                                       |
| $V$ , Å <sup>3</sup>                             | 25070.1(10)                                                              | 24833.5(7)                                                               | 24764.7(12)                                                              | 24822(3)                                                                 |
| $Z$                                              | 4                                                                        | 4                                                                        | 4                                                                        | 4                                                                        |
| $\mu$ , mm <sup>-1</sup>                         | 21.495                                                                   | 21.752                                                                   | 21.864                                                                   | 22.275                                                                   |
| $F(000)$                                         | 23760                                                                    | 23776                                                                    | 23792                                                                    | 24048                                                                    |
| $D_c$ , g cm <sup>-3</sup>                       | 3.548                                                                    | 3.583                                                                    | 3.596                                                                    | 3.640                                                                    |
| $T$ , K                                          | 150(2) K                                                                 | 150(2) K                                                                 | 150(2) K                                                                 | 150(2) K                                                                 |
| Limiting indices                                 | $-53 \leq h \leq 52$ ,<br>$-18 \leq k \leq 18$ ,<br>$-40 \leq l \leq 40$ | $-53 \leq h \leq 53$ ,<br>$-15 \leq k \leq 18$ ,<br>$-48 \leq l \leq 42$ | $-53 \leq h \leq 53$ ,<br>$-18 \leq k \leq 16$ ,<br>$-48 \leq l \leq 42$ | $-53 \leq h \leq 39$ ,<br>$-16 \leq k \leq 18$ ,<br>$-48 \leq l \leq 48$ |
| Reflections<br>collected/unique                  | 71570 / 21643                                                            | 86830 / 21864                                                            | 68544 / 21785                                                            | 86923 / 21987                                                            |
| $R_{\text{int}}$                                 | 0.0732                                                                   | 0.0310                                                                   | 0.0493                                                                   | 0.0758                                                                   |
| Data/restraints/<br>parameters                   | 21643 / 90 / 1439                                                        | 21864 / 0 / 1439                                                         | 21785 / 18 / 1454                                                        | 21987 / 2 / 1404                                                         |
| $GOF$ on $F^2$                                   | 1.040                                                                    | 1.081                                                                    | 1.070                                                                    | 1.004                                                                    |
| $R_1$ , $wR_2$ ( $I > 2\sigma(I)$ ) <sup>a</sup> | 0.0452, 0.1046                                                           | 0.0271, 0.0692                                                           | 0.0405, 0.1086                                                           | 0.0653, 0.1733                                                           |
| $R_1$ , $wR_2$ (all data)                        | 0.0602, 0.1099                                                           | 0.0308, 0.0707                                                           | 0.0465, 0.1117                                                           | 0.0844, 0.1873                                                           |

**Table S2.** The ratios of  $I(^5D_0 \rightarrow ^7F_2) / I(^5D_0 \rightarrow ^7F_1)$  for **4** in aqueous solution with different DPA concentrations.

| $C_{\text{DPA}}$ | $I(^5D_0 \rightarrow ^7F_2)$ | $I(^5D_0 \rightarrow ^7F_1)$ | ratio |
|------------------|------------------------------|------------------------------|-------|
| 0                | 63675.813                    | 24022.391                    | 2.651 |
| 25               | 64681.438                    | 24961.701                    | 2.591 |
| 50               | 67111.586                    | 24579.338                    | 2.730 |
| 75               | 69350.234                    | 25729.549                    | 2.695 |
| 100              | 72506.305                    | 25175.031                    | 2.880 |
| 125              | 75899.258                    | 23641.924                    | 3.210 |
| 150              | 78256.195                    | 26268.303                    | 2.979 |
| 175              | 80972.7813                   | 26440.9141                   | 3.062 |
| 200              | 84845.8203                   | 25837.1758                   | 3.284 |
| 225              | 86845.2422                   | 27807.543                    | 3.123 |
| 250              | 89668.6094                   | 26691.5605                   | 3.359 |
| 275              | 93189.4297                   | 28469.9766                   | 3.273 |
| 300              | 96212.6797                   | 25850.9043                   | 3.722 |
| 325              | 98736.7031                   | 28384.6523                   | 3.479 |
| 350              | 105197.3105                  | 30837.5586                   | 3.411 |

|     |             |            |       |
|-----|-------------|------------|-------|
| 375 | 112554.1025 | 30378.7109 | 3.705 |
| 400 | 125073.1250 | 31405.9023 | 3.839 |

**Table S3.** The standard deviations for 4-based FL sensor.

|          | <i>I</i> (FL intensity of the peak at 614 nm) | AVG. (Average of <i>I</i> ) | AVG. / <i>I</i> | Standard deviation ( <i>s</i> ) |
|----------|-----------------------------------------------|-----------------------------|-----------------|---------------------------------|
| Sample 1 | 58779.95                                      |                             | 0.9969          |                                 |
| Sample 2 | 58551.65                                      | 58603.47                    | 1.0009          | $2.681 \times 10^{-3}$          |
| Sample 3 | 58478.82                                      |                             | 1.0021          |                                 |

The standard deviation ( $s = 2.681 \times 10^{-3}$ ) calculated above and the slope  $k$  (0.0021) of the linear curve obtained are substituted into the equation  $LOD = 3s / k$ , and the detection limit is calculated as  $3.83 \mu\text{M}$ .

**Table S4.** Performance comparison of several sensors for the detection of DPA.

| Sensor                                                  | Detection method              | Linear                                   | LOD                                   | Real sample analysis        | Ref.      |
|---------------------------------------------------------|-------------------------------|------------------------------------------|---------------------------------------|-----------------------------|-----------|
| SiNPs-Eu <sup>3+</sup>                                  | Fluorometric                  | 0.6-600 nM                               | 0.2 nM                                |                             | 6         |
| Pdots-Tb <sup>3+</sup>                                  | Fluorometric                  | 0.2-64 nM                                | 0.2 nM                                |                             | 7         |
| DO2A-Tb <sup>3+</sup>                                   | Fluorometric                  | 0-24 nM                                  | 6 nM                                  | Bacterial endospores        | 8         |
| g-C <sub>3</sub> N <sub>4</sub> /CitNa/Eu <sup>3+</sup> | Fluorometric                  | 0-15 $\mu\text{M}$                       | 13 nM                                 | tape water and orange juice | 9         |
| R6G/Eu-CdS@ZIF-8                                        | Fluorometric                  | 0.1-150 $\mu\text{M}$                    | 67 nM                                 | Bacterial endospores        | 10        |
| GNPs-Tb <sup>3+</sup> and Eu <sup>3+</sup>              | Fluorometric                  | 0-100 $\mu\text{M}$                      | 1 $\mu\text{M}$                       |                             | 11        |
| BODIPY-Cu <sup>2+</sup>                                 | Colorimetric and fluorometric | 0-10 $\mu\text{M}$                       | 2 $\mu\text{M}$                       | Bacterial endospores        | 12        |
| Eu-MOF                                                  | Fluorometric                  | 0-100 $\mu\text{M}$                      | 3.8 $\mu\text{M}$                     |                             | 13        |
| R6H@Eu(BTC)                                             | Colorimetric and fluorometric | 0-120 $\mu\text{M}$ / 0-80 $\mu\text{M}$ | 4.5 $\mu\text{M}$ / 8.9 $\mu\text{M}$ | water                       | 14        |
| Eu-POM                                                  | Fluorometric                  | 0-325 $\mu\text{M}$                      | 3.83 $\mu\text{M}$                    | Top water and Serum         | this work |

**Table S5.** Detection results of DPA in tap water and human serum sample.

| Sample      | Found | Spiked ( $\mu\text{M}$ ) | Measure ( $\mu\text{M}$ ) | Recovery (%) | RSD (n = 3, %) |
|-------------|-------|--------------------------|---------------------------|--------------|----------------|
| Tap water   | Not   | 30                       | 28.49                     | 94.98        | 1.66           |
|             |       | 50                       | 49.79                     | 99.57        | 3.88           |
|             |       | 70                       | 69.88                     | 99.83        | 1.20           |
| Human serum | Not   | 30                       | 31.30                     | 104.35       | 6.80           |
|             |       | 50                       | 50.87                     | 101.75       | 3.70           |
|             |       | 70                       | 67.68                     | 96.68        | 6.37           |

**Table S6.** Summary of the lifetimes of Eu(NO<sub>3</sub>)<sub>3</sub>·6H<sub>2</sub>O (3 mg / mL) in H<sub>2</sub>O and D<sub>2</sub>O with different DPA concentrations and the calculated  $q$  values.



| CDPA / $\mu\text{M}$ | $T_{\text{H}_2\text{O}}$ / ms | $T_{\text{D}_2\text{O}}$ / ms | q   |
|----------------------|-------------------------------|-------------------------------|-----|
| 0                    | 0.112                         | 2.702                         | 9.0 |
| 100                  | 0.114                         | 2.831                         | 8.9 |
| 200                  | 0.115                         | 2.893                         | 8.8 |
| 300                  | 0.116                         | 2.976                         | 8.7 |
| 400                  | 0.117                         | 2.995                         | 8.7 |

## References

- [1] G. M. Sheldrick, SADABS: Program for Absorption Correction, University of Göttingen, Germany, **1997**.
- [2] G. M. Sheldrick, SHELXS 97, Program for Crystal Structure Solution, University of Göttingen, Germany, **1997**.
- [3] G. M. Sheldrick, SHELXL 97, Program for Crystal Structure Refinement, University of Göttingen, Germany, **1997**.
- [4] H. L. Li, C. Lian, L. J. Chen, J. W. Zhao and G. Y. Yang, Two unusual nanosized  $\text{Nd}^{3+}$ -substituted selenotungstate aggregates simultaneously comprising lacunary Keggin and Dawson polyoxotungstate segments, *Nanoscale*, 2020, **12**, 16091–16101.
- [5] (a) Y. J. Niu, Q. F. Xu, Y. Wang, Z. Li, J. K. Lu, P. T. Ma, C. Zhang, J. Y. Niu and J. P. Wang, Preparation, characterization, and catalytic performances of a pyrazine dicarboxylate-bridging rare-earth-containing polytungstoarsenate aggregate for selective oxidation of thiophenes and deep desulfurization of model fuels, *Dalton Trans.*, 2018, **47**, 9677–9684.; (b) Q. Han, Z. Li, X. M. Liang, Y. Ding and S.-T. Zheng, Synthesis of a 6-nm-long transition-metal-rare-earth-containing polyoxometalate, *Inorg. Chem.*, 2019, **58**, 12534–12537
- [6] K. L. Ai, B. H. Zhang and L. H. Lu, Europium-based fluorescence nanoparticle sensor for rapid and ultrasensitive detection of an anthrax biomarker, *Angew. Chem. Int. Ed.*, 2009, **48**, 304–308.
- [7] Q. Li, K. Sun, K. W. Chang, J. B. Yu, D. T. Chiu, C. F. Wu and W. P. Qin, Ratiometric luminescent detection of bacterial spores with terbium chelated semiconducting polymer Dots, *Anal. Chem.*, 2013, **85**, 9087–9091.
- [8] M. L. Cable, J. P. Kirby, K. Sorasaene, H. B. Gray and A. Ponce, Bacterial spore detection by  $[\text{Tb}^{3+}(\text{macrocycle})(\text{dipicolinate})]$  Luminescence, *J. Am. Chem. Soc.*, 2007, **129**, 1474–1475.
- [9] M. Yuan, Y. Jin, L. Yu, Y. M. Bu, M. T. Sun, C. Yuan and S. H. Wang, Europium-modified carbon nitride nanosheets for smartphone-based fluorescence sensitive recognition of anthrax biomarker dipicolinic acid, *Food Chem.*, 2023, **398**, 133884.
- [10] X. Q. Li, J. J. Luo, L. Deng, F. H. Ma and M. H. Yang, In situ incorporation of fluorophores in zeolitic imidazolate framework-8 (ZIF-8) for ratio-dependent detecting a biomarker of anthrax spores, *Anal. Chem.*, 2020, **92**, 7114–7122.
- [11] M. Donmea, M. D. Yilmaz and B. Kilbas, Fluorescent detection of dipicolinic acid as a biomarker of bacterial spores using lanthanide-chelated gold nanoparticles, *J. Hazard. Mater.*, 2017, **324**, 593–598.
- [12] Y. Cetinkaya, M. N. Z. Yurt, H. A. Oktem and M. D. Yilmaz, A monostyryl boradiazaindacene (BODIPY)-based lanthanide-free colorimetric and fluorogenic probe for sequential sensing of copper (II) ions and dipicolinic acid as a biomarker of bacterial endospores, *J. Hazard. Mater.*, 2019, **377**, 299–304.
- [13] D. Wu, Z. Zhang, X. W. Chen, L. K. Meng, C. G. Li, G. H. Li, X. B. Chen, Z. Shi and S. H. Feng, A non-luminescent Eu-MOF-based “turn-on” sensor towards an anthrax biomarker through single-crystal to single-crystal phase transition, *Chem. Commun.*, 2019, **55**, 14918–14921.
- [14] K. Y. Shi, Z. C. Yang, L. H. Dong and B. Yu, Dual channel detection for anthrax biomarker dipicolinic acid: the combination of an emission turn on probe and luminescent metal-organic frameworks, *Sens. Actuators B Chem.*, 2018, **266**, 263–269.
